# Supplementary material
Source: Springer Nature journal article supplement (https://www.springermedizin.de/resource/supplementary/12887_2012_809_MOESM2_ESM.pdf/9476288)

**Pregnancy**

**Participants of the first phase of the APrON  
n=600**

Moved out of Alberta  
**n= 6**

Miscarriage  
**n= 9**

Non-respondent/withdrawal  
**n=115**

---

**Study Baseline**

**Completed 3-month infant questionnaires  
n= 470 (78.34%)**

Twins  
**n=8**

Phenylketonuria  
**n=1**

Errors, inconsistencies or  
missing responses  
**n=29**

Low birth weight (<2.5kg) or  
preterm (<37 wks)  
**n=30**

**3-Month Postpartum**

**Complete 3-month  
questionnaires  
n=402 (85.53%)**

Errors, inconsistencies or  
missing responses  
**n=24**

Non-respondent/withdrawal  
**n= 78**

**6-Month Postpartum**

**Complete 6-month  
questionnaires  
n=300 (63.83%)**

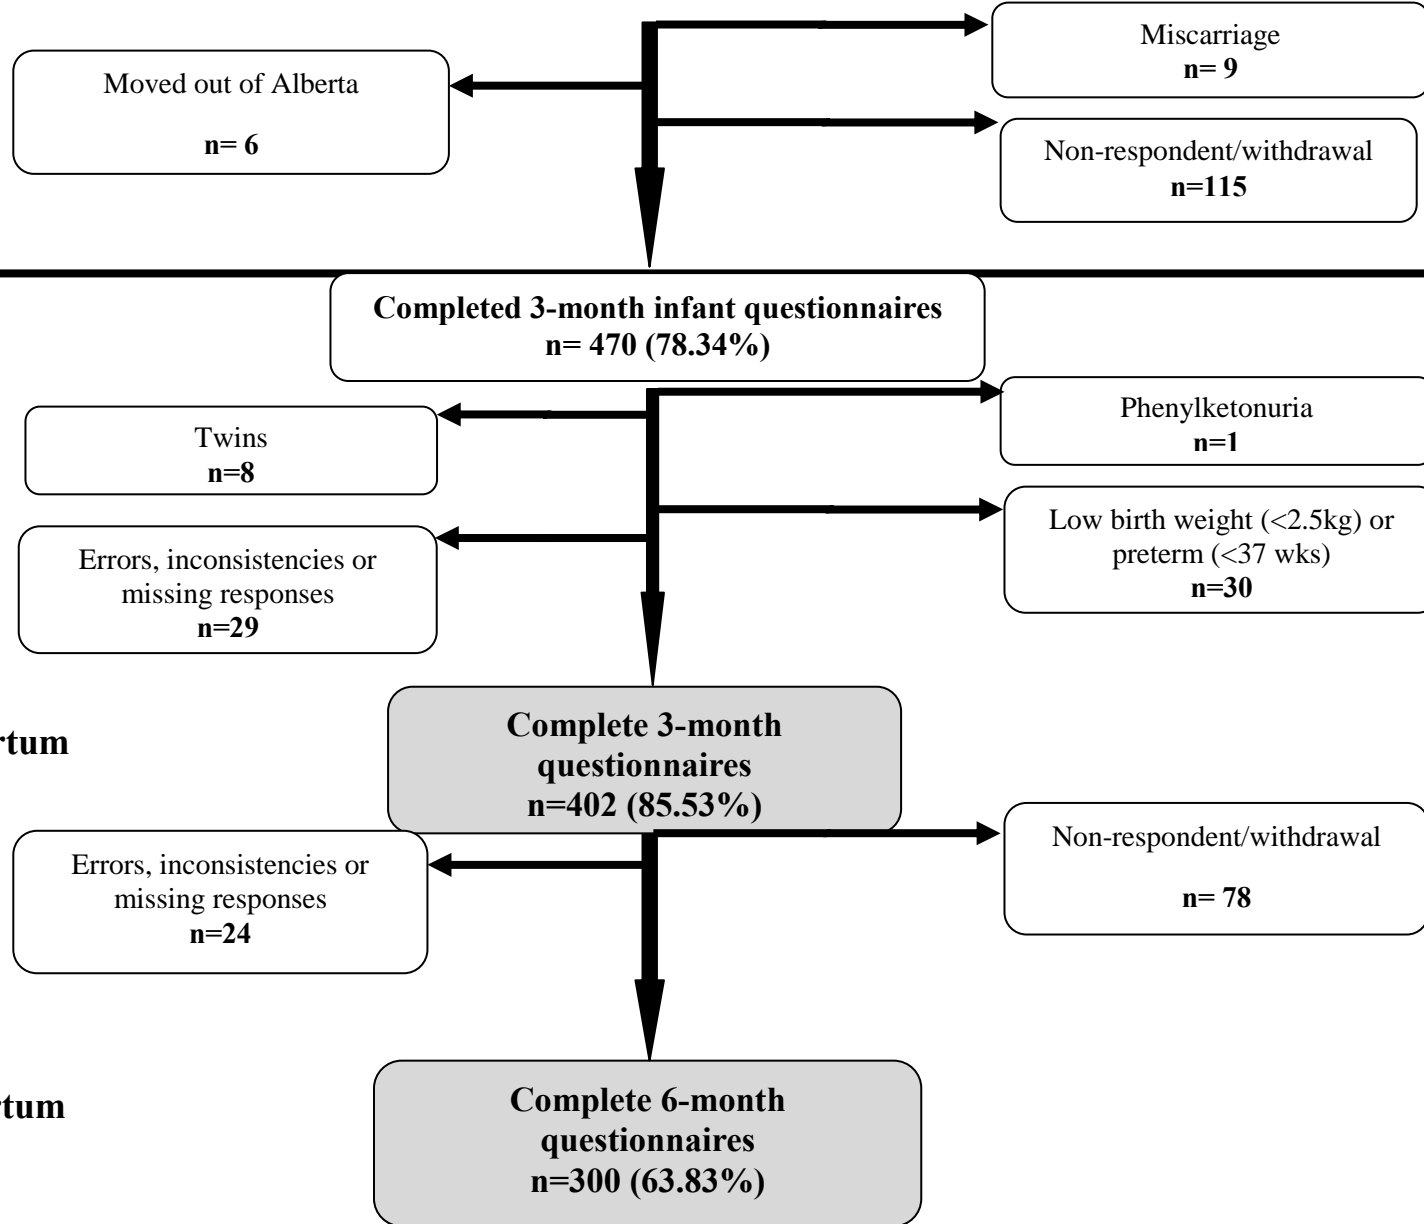

Supplement: MOESM2 [file 9476288]
